# Supplementary material for: Enhancing the performance of organic solar cells by using PDINN-doped PEDOT:PSS as the hole transport layer
Source: Royal Society of Chemistry journal article supplement (doi:10.1039/d3py01211e), 2024-01-01
Supplement: d3py01211e1.pdf [file d3py01211e1.pdf]

## Supporting Information

# Enhancing the Performance of Organic Solar Cells by Using PDINN-doped PEDOT:PSS as the Hole Transport Layer

Zhenyu Zhang,<sup>a</sup> Cai'e Zhang,<sup>b</sup> Wenlong Liu,<sup>a</sup> Xinming Zheng,<sup>a</sup> Qiaoling Chen,<sup>a</sup> Chuluo Yang,<sup>\*b</sup>  
Xinjun Xu<sup>\*a</sup> and Zhishan Bo<sup>\*ac</sup>

<sup>a</sup> Key Laboratory of Energy Conversion and Storage Materials, College of Chemistry, Beijing Normal University, Beijing 100875, China.

<sup>b</sup> Shenzhen Key Laboratory of New Information Display and Storage Materials, College of Materials Science and Engineering, Shenzhen University, Shenzhen 518060, China.

<sup>c</sup> College of Textiles & Clothing, State Key Laboratory of Bio-fibers and Eco-textiles, Qingdao University, Qingdao, 266071, China

## Experimental Section

### Materials and Instruments

The ITO glass was purchased from the South China Science & Technology Company. The PM6 and L8-BO were purchased from Derthon. The PDINN and PNDIT-F3N was purchased from Organtec Ltd. All these solvents used here were commercially available from Sigma-Aldrich. The PEDOT:PSS (Clevios P VP AI 4083) was purchased from Heraeus. The Y6 and D18 were synthesized by our own laboratory according to the procedure reported in literature.<sup>1,2</sup> All materials were used as received without further purification.

UV-visible absorption spectra were obtained on a PerkinElmer UV-vis spectrometer (model Lambda 750). Atomic force microscopy (AFM) measurements were performed under ambient conditions using a Digital Instrument Multimode Nanoscope IIIA operating in the tapping mode. The thickness of the blend films and transport layer were determined by a Dektak 6 M surface profile meter. Ultraviolet photoelectron spectroscopy (UPS) experiments were carried out on a Thermo Scientific ESCALab 250Xi spectrometer. The gas discharge lamp was used for UPS with helium gas admitted and the He I (21.22 eV) emission line employed. The helium pressure in the analysis chamber during analysis was about 2e-8 mbar. The data were acquired with -10 V bias. Contact angle characterization was performed on DSA100, Kruss. Raman spectra was collected with a confocal Raman spectrometer (HORIBA, LABRAM HR-800) using a 532 nm laser as the excitation source. The X-ray photoelectron spectroscopy (XPS) was evaluated via employment of the Thermo Scientific\* ESCALAB 250Xi instrument.

---

Photoluminescence quenching spectroscopy was conducted using PG2000-Pro (400-1000 nm) and NIR1700 (900-1700 nm) Scientific Grade Spectrometer (idea optics, China). Impedance spectrogram analysis uses a cold light source of halogens LG-150 model instrument to simulate a light source.

### **Preparation of PEDOT:PSS with PDINN**

PEDOT:PSS-PDINN solution was prepared by adding 1 wt% PDINN aqueous solution with 0.2% acetic acid into PEDOT:PSS solution.

### **OSC Device Fabrication and Characterization**

The conventional devices were fabricated with the structure of ITO/PEDOT:PSS, PEDOT:PSS-PDINN/PM6:Y6/PNDIT-F3N/Ag. Substrates are quartz or indium tin oxide (ITO) coated glass, depending on the type of measurement. All substrates were cleaned in ultrasonic bath with washing solution, deionized water, isopropyl alcohol, and deionized water, consecutively. The substrates were dried on a hotplate at 160 °C for 10 min, and were then treated with UV-ozone for 25 min. PEDOT:PSS solution with/without PDINN filtered by polyether sulfone filter (0.45  $\mu\text{m}$ ) was spin-coated on these cleaned ITO substrates at the speed of 3500 rpm for 20 s to obtain a film thickness of 30 nm, followed by annealing at 150 °C for 15 min in air before being transferred into a glovebox. The blend solutions of PM6:Y6 (D/A weight ratio, 1:1.2) mixtures were all processed with chloroform (CF) with a polymer concentration of 6.5 mg/mL. Chloronaphthalene (CN) was added to the active layer solution at 0.5 vol% of the solution, and then spin-coated at 1700 rpm for 30 s to obtain a film thickness of 100 nm on the top of the HTL, and then annealing 100 °C for 5 min. Methanol solution of PNDIT-F3N (1 mg/mL) was then deposited atop the active layer at 3000 rpm for 30 s. The Ag layer (100 nm) electrodes were sequentially evaporated onto the electron transport layer, at a vacuum pressure below  $4.0 \times 10^{-4}$  pa. The blend solution of D18:L8-BO (D/A weight ratio, 1:1) mixtures were all processed with chloroform (CF) with a polymer concentration of 4 mg/mL, and then spin-coated at 2000 rpm for 30 s to obtain a film thickness of 100 nm on the top of the HTL. Methanol solution of PNDIT-F3N (1 mg/mL) was then deposited atop the active layer at 3000 rpm for 30 s. The Ag layer (100 nm) electrodes were sequentially evaporated onto the electron transport layer, at a vacuum pressure below  $4.0 \times 10^{-4}$  pa. Both of the two active layers solutions were heated at 40 °C for 2 hours to obtain well-mixed blend solutions. The effective device area, defined by the overlap region of ITO and Ag electrodes, was 0.04  $\text{cm}^2$ . The  $J$ - $V$  curves of photocurrents were recorded in glove box at approximately 25 °C using an instrument from Enli Technology Ltd., Taiwan (SS-F53A) under AM 1.5G illumination (AAA class solar simulator, with an intensity of 100  $\text{mW cm}^{-2}$  calibrated with a standard single crystal Si photovoltaic cell). External quantum efficiency (EQE) measurements were conducted in air without encapsulation. The EQE data were obtained using a solar cell spectral response measurement system

(QER3011, Enli Technology Co.Ltd), and the intensity was calibrated with a standard single-crystal Si photovoltaic cell.

### Space-Charge-Limited-Current Measurement

The hole and electron-only devices with structures of ITO/HTL/active layer/MoO<sub>3</sub>/Ag and ITO/ZnO/active layer/PDINN/Ag were fabricated, respectively. Dark  $J$ - $V$  curves of the hole/electron devices were measured by the space-charge limited current (SCLC) method. Dark  $J$ - $V$  curves were fitted by using the Mott-Gurney equation:  $J = 9\epsilon_0\epsilon_r\mu V/8d^3$ , where  $J$  is the space charge limited current,  $\epsilon_0$  is the vacuum permittivity ( $\epsilon_0 = 8.85 \times 10^{-12}$  F/m),  $\epsilon_r$  is the permittivity of the active layer ( $\epsilon_r \approx 3$ ),  $\mu$  is charge mobility, and  $d$  is the thickness of the active layer.

**Table S1.** Photovoltaic properties of multi-component OPV cells in incorporation with PM6:Y6-based active layer

| Active layer                      | D/A ratio      | $V_{oc}$<br>(V) | $J_{sc}$<br>(mA cm <sup>-2</sup> ) | FF<br>(%) | PCE<br>(%) | Ref. |
|-----------------------------------|----------------|-----------------|------------------------------------|-----------|------------|------|
| PM6:Y6                            | 1:1.2          | 0.83            | 25.3                               | 74.8      | 15.7       | 1    |
| PM6:J71:Y6                        | 0.9:0.1:1.2    | 0.85            | 25.55                              | 76.0      | 16.5       | 4    |
| PM6:PDHP-Th:Y6                    | 1:0.1:1.2      | 0.85            | 26.6                               | 71.7      | 16.2       | 5    |
| PM6:PDHP-Ph:Y6                    | 1:0.03:1.2     | 0.823           | 26.58                              | 68.2      | 15.4       | 5    |
| PM6:TPD-3F:Y6                     | 0.9:0.1:1.2    | 0.893           | 25.83                              | 73.7      | 17.0       | 6    |
| PM6:PBDB-T-SF:Y6                  | 0.85:0.15:1.2  | 0.86            | 25.21                              | 76.11     | 16.4       | 7    |
| PM6:PhI-Th:Y6                     | 1:0.15:1.2     | 0.85            | 24.8                               | 72.1      | 15.2       | 8    |
| PM6:PhI-Se:Y6                     | 1:0.15:1.2     | 0.85            | 25.7                               | 75.5      | 16.4       | 8    |
| PM6:PhI-Se:Y6:PC <sub>71</sub> BM | 1:0.15:1.2:0.2 | 0.85            | 26.3                               | 76.8      | 17.2       | 8    |
| PM6:S3:Y6                         | 0.8:0.2:1.2    | 0.86            | 25.86                              | 79.17     | 17.53      | 9    |
| PM6:SM1:Y6                        | 0.85:0.15:1.2  | 0.83            | 25.7                               | 77.5      | 16.55      | 10   |
| PM6:BTR:Y6                        | 0.95:0.05:1.2  | 0.84            | 25.8                               | 76.7      | 16.6       | 11   |
| PM6:BPR-SCl:Y6                    | 0.75:0.25:1    | 0.87            | 25.77                              | 75        | 16.7       | 12   |
| PM6:ECTBD:Y6                      | 0.85:0.15:1.2  | 0.85            | 25.54                              | 76.24     | 16.52      | 13   |
| PM6:DRTB-T-C4:Y6                  | 0.9:0.1:1.2    | 0.85            | 24.74                              | 81.3      | 17.13      | 14   |
| PM6:P1:Y6                         | 0.6:0.4:1.2    | 0.87            | 25.45                              | 73.23     | 16.2       | 15   |
| PM6:Y6:PC <sub>61</sub> BM        | 1:1.2:0.2      | 0.85            | 25.40                              | 77        | 16.5       | 16   |
| PM6:Y6:PC <sub>71</sub> BM        | 1:1.2:0.1      | 0.861           | 25.10                              | 77.20     | 16.70      | 17   |
| PM6:Y6:PC <sub>71</sub> BM        | 1:1.0:0.2      | 0.85            | 25.70                              | 76.35     | 16.67      | 18   |

---

|                                                  |             |       |       |       |       |    |
|--------------------------------------------------|-------------|-------|-------|-------|-------|----|
| PM6:Y6:PC <sub>71</sub> BM <sub>(flexible)</sub> | 1:1.0:0.2   | 0.828 | 23.57 | 72.03 | 14.06 | 18 |
| PM6:Y6:PC <sub>71</sub> BM                       | 1:1.0:0.2   | 0.85  | 27.5  | 73.1  | 17.1  | 19 |
| PM6:Y6:PC <sub>71</sub> BM                       | 1:0.96:0.24 | 0.83  | 26.0  | 75.9  | 16.3  | 20 |
| PM6:Y6:IDIC                                      | 1:1.0:0.2   | 0.87  | 25.39 | 74.92 | 16.51 | 21 |
| PM6:Y6:MF1                                       | 1:1.08:0.12 | 0.853 | 25.68 | 78.61 | 17.2  | 22 |
| PM6:Y6:IN-4F                                     | 1:1.2:0.1   | 0.85  | 25.70 | 74.5  | 16.3  | 23 |
| PM6:Y6:IT-4F                                     | 1:1.2:0.2   | 0.844 | 25.4  | 75.9  | 16.27 | 24 |
| PM6:Y6:ITCPTC                                    | 1:1.14:0.06 | 0.86  | 25.67 | 78.8  | 17.42 | 25 |
| PM6:Y6:N7IT                                      | 1:1.14:0.06 | 0.85  | 25.53 | 77.7  | 16.96 | 25 |
| PM6:Y6:PF2-DTC                                   | 1:1.14:0.06 | 0.85  | 25.69 | 77.5  | 17.04 | 25 |
| PM6:Y6:3TP3T-4F                                  | 1:1.02:0.18 | 0.85  | 25.9  | 74.9  | 16.7  | 26 |
| PM6:Y6:3TP3T-IC                                  | 1:1.02:0.18 | 0.86  | 25.2  | 71.6  | 15.6  | 26 |
| PM6:Y6:O-IDTBR                                   | 1:0.85:0.15 | 0.85  | 25.75 | 76    | 16.6  | 27 |
| PM6:Y6:C8-DTC                                    | 1:1.08:0.12 | 0.873 | 26.50 | 75.61 | 17.52 | 28 |
| PM6:Y6:Y-Th2                                     | 1:1.05:0.15 | 0.851 | 25.33 | 71.44 | 16.01 | 29 |
| PM6:Y6:FBTIC                                     | 1:1.0:0.2   | 0.866 | 24.6  | 77.9  | 16.7  | 30 |
| PM6:Y6:BTP-M                                     | 1:1.2:0.2   | 0.88  | 26.56 | 73.46 | 17.03 | 31 |
| PM6:Y6:BTP-S2                                    | 1:0.96:0.24 | 0.88  | 26.20 | 75.80 | 17.4  | 32 |
| PM6:Y6:SY3                                       | 1:1:0.2     | 0.855 | 25.51 | 78.2  | 17.1  | 33 |
| PM6:Y6:N2200 <sub>(spin)</sub>                   | 1:1.2:0.12  | 0.83  | 26.3  | 76    | 16.6  | 34 |
| PM6:Y6:N2200 <sub>(blade)</sub>                  | 1:1.2:0.12  | 0.83  | 26.3  | 74    | 16.0  | 34 |
| PM6:Y6:BTf                                       | 1:1.2:0.1   | 0.853 | 26.11 | 74.22 | 16.5  | 35 |
| PM6:Y6:DFBT-TT6                                  | 1:1.2:0.066 | 0.845 | 26.56 | 76    | 17.1  | 36 |
| PM6:Y6:DIBC                                      | 1:1.2:0.1   | 0.83  | 25.61 | 77.12 | 16.4  | 37 |
| PM6:Y6:APDC-TPDA                                 | 1:1.2:0.1   | 0.84  | 25.98 | 77.5  | 17.0  | 38 |
| PM6:Y6:IDMIC-4F                                  | 1:1.08:0.12 | 0.864 | 25.60 | 74.20 | 16.60 | 39 |
| PM6:Y6:PIDTC-T                                   | 1:1.2:0.02  | 0.847 | 25.50 | 77.60 | 16.76 | 40 |
| PM6:Y6:IDIC:PC <sub>71</sub> BM                  | 1:1:0.2:0.1 | 0.87  | 26.19 | 75.29 | 17.07 | 41 |
| PM6:Y6:Br-ITIC                                   | 1:1.08:0.12 | 0.854 | 25.5  | 75.1  | 16.4  | 42 |

|                                    |                  |       |       |       |      |    |
|------------------------------------|------------------|-------|-------|-------|------|----|
| PM6:Y6:Br-ITIC:PC <sub>71</sub> BM | 1:1.08:0.12:0.12 | 0.85  | 25.8  | 76.4  | 16.8 | 42 |
| PM6:PM7:Y6:PC <sub>71</sub> BM     | 0.8:0.2:1.2:0.25 | 0.859 | 26.55 | 79.23 | 18.1 | 43 |

**Table S2.** Photovoltaic parameters of PM6:Y6-based OSCs subjected to different treatment processing

| Active layer               | Processing conditions                               | $V_{oc}$<br>(V) | $J_{sc}$<br>(mA cm <sup>-2</sup> ) | FF<br>(%) | PCE<br>(%) | Ref. |
|----------------------------|-----------------------------------------------------|-----------------|------------------------------------|-----------|------------|------|
| PM6:Y6                     | CB 80 °C                                            | 0.796           | 21.12                              | 72.15     | 12.2       | 44   |
| PM6:Y6                     | CF 80 °C                                            | 0.835           | 26.52                              | 76.21     | 16.88      | 44   |
| PM6:Y6                     | CB solution/substrate<br>temperature (80/80 °C)     | 0.82            | 25.9                               | 70.0      | 15.2       | 45   |
| PM6:Y6                     | o-XY solution/substrate<br>temperature (100/100 °C) | 0.81            | 26.6                               | 70.3      | 15.6       | 45   |
| PM6:Y6                     | TMB solution/substrate<br>temperature (110/110 °C)  | 0.80            | 26.4                               | 70.9      | 15.4       | 45   |
| PM6:Y6                     | Solvent-flushing (0.5%<br>Acac)                     | 0.857           | 25.50                              | 75.57     | 16.5       | 46   |
| PM6:Y6:PC <sub>71</sub> BM | Single-annealed 100 °C                              | 0.84            | 25.40                              | 75        | 16.0       | 47   |
| PM6:Y6:PC <sub>71</sub> BM | Single-annealed 120 °C                              | 0.83            | 25.90                              | 74        | 15.9       | 47   |
| PM6:Y6:PC <sub>71</sub> BM | Double-annealed 100/120<br>°C                       | 0.83            | 26.60                              | 76        | 16.8       | 47   |
| PM6:Y6                     | 0.01 wt% BCF                                        | 0.84            | 25.96                              | 73.47     | 16.0       | 48   |
| PM6:Y6:PC <sub>71</sub> BM | 0.004 wt% BV                                        | 0.84            | 26.3                               | 77        | 17.1       | 49   |
| PM6:Y6                     | 1 wt% GCl                                           | 0.840           | 26.09                              | 79.05     | 17.3       | 50   |
| PM6:Y6                     | 1.5% CN 400 nm                                      | 0.81            | 26.3                               | 68.1      | 14.4       | 51   |
| PM6:Y6                     | A3                                                  | 0.820           | 26.50                              | 76.05     | 16.50      | 52   |
| PM6:Y6                     | 0.5% PN                                             | 0.820           | 25.90                              | 71.80     | 15.40      | 53   |
| PM6:Y6                     | PHJ                                                 | 0.830           | 26.52                              | 70.88     | 15.41      | 54   |
| PM6:Y6                     | SA-4                                                | 0.804           | 25.7                               | 73.4      | 15.2       | 55   |
| PM6:Y6                     | INB-1F                                              | 0.81            | 27.0                               | 72.0      | 15.7       | 56   |
| PM6:Y6                     | INB-3F                                              | 0.81            | 27.1                               | 72.2      | 15.8       | 56   |

|        |                        |       |       |       |       |    |
|--------|------------------------|-------|-------|-------|-------|----|
| PM6:Y6 | INB-5F                 | 0.81  | 27.7  | 74.3  | 16.4  | 56 |
| PM6:Y6 | Ferrocene              | 0.838 | 26.71 | 76.00 | 17.40 | 57 |
| PM6:Y6 | MeOH(vapor atmosphere) | 0.86  | 26.43 | 77.39 | 17.59 | 58 |
| PM6:Y6 | BBS                    | 0.858 | 27.1  | 75.5  | 17.6  | 59 |
| PM6:Y6 | PCN3                   | 0.860 | 26.73 | 77.35 | 17.80 | 60 |

**Table S3.** Photovoltaic parameters of PM6:Y6-based OSCs with different interfacial layers/electrodes

| Active layer               | Interfacial layer/electrode                             | $V_{oc}$<br>(V) | $J_{sc}$<br>(mA cm <sup>-2</sup> ) | FF<br>(%) | PCE<br>(%) | Ref. |
|----------------------------|---------------------------------------------------------|-----------------|------------------------------------|-----------|------------|------|
| PM6:Y6                     | g-C <sub>3</sub> N <sub>4</sub> :PEDOT:PSS              | 0.84            | 26.71                              | 73        | 16.40      | 61   |
| PM6:Y6                     | PEDOT:PSS-DA                                            | 0.84            | 25.52                              | 77.1      | 16.6       | 62   |
| PM6:Y6                     | PEDOT:PSS(TEMPO+Br)                                     | 0.82            | 27.18                              | 72.59     | 16.1       | 63   |
| PM6:Y6                     | PEDOT:PSS-Nafion<br>(4 : 1)                             | 0.84            | 25.76                              | 75.40     | 16.3       | 64   |
| PM6:Y6                     | PEDOT:PSS-0.75%SG                                       | 0.841           | 26.58                              | 78.21     | 17.4       | 65   |
| PM6:Y6                     | PEDOT:PSS/Ti <sub>3</sub> C <sub>2</sub> T <sub>x</sub> | 0.830           | 25.63                              | 68.40     | 14.5       | 66   |
| PM6:Y6                     | CPA-PEDOT:PSS                                           | 0.84            | 25.5                               | 77.0      | 16.5       | 67   |
| PM6:Y6                     | CuSCN/TFB                                               | 0.85            | 24.45                              | 72.69     | 15.1       | 68   |
| PM6:Y6                     | WS <sub>2</sub>                                         | 0.84            | 25.9                               | 73        | 15.8       | 69   |
| PM6:Y6:PC <sub>71</sub> BM | WS <sub>2</sub>                                         | 0.84            | 26.0                               | 78        | 17         | 69   |
| PM6:Y6                     | Aqueous MoO <sub>x</sub> (200°C)                        | 0.845           | 27.43                              | 73.8      | 17.1       | 70   |
| PM6:Y6                     | TMO                                                     | 0.830           | 26.53                              | 72.00     | 15.7       | 71   |
| PM6:Y6                     | POE                                                     | 0.830           | 25.14                              | 68.11     | 13.8       | 72   |
| PM6:Y6                     | BiOCl NPs                                               | 0.83            | 27.07                              | 71.70     | 16.1       | 73   |
| PM6:Y6                     | S-FrGO                                                  | 0.77            | 24.64                              | 69.9      | 13.3       | 74   |
| PM6:Y6:PC <sub>71</sub> BM | NDI-NI                                                  | 0.86            | 25.40                              | 76.14     | 16.86      | 75   |
| PM6:Y6:PC <sub>71</sub> BM | TiO <sub>x</sub> N <sub>y</sub>                         | 0.850           | 26.18                              | 76.41     | 17.02      | 76   |
| PM6:Y6:PC <sub>71</sub> BM | Phen-NaDPO:Sn(SCN) <sub>2</sub>                         | 0.850           | 26.20                              | 70.00     | 15.60      | 77   |
| PM6:Y6:PC <sub>71</sub> BM | PEDOT:PSS <sub>(wash)</sub>                             | 0.850           | 25.86                              | 76.20     | 16.75      | 78   |
| PM6:Y6:PC <sub>71</sub> BM | PCPDTK <sub>0.50</sub> H <sub>0.50</sub> -TT            | 0.854           | 25.10                              | 75.9      | 16.3       | 79   |

|                            |                                                   |       |       |       |       |    |
|----------------------------|---------------------------------------------------|-------|-------|-------|-------|----|
| (0.04 cm <sup>2</sup> )    |                                                   |       |       |       |       |    |
| PM6:Y6:PC <sub>71</sub> BM |                                                   |       |       |       |       |    |
| (1 cm <sup>2</sup> )       |                                                   |       |       |       |       |    |
|                            | PCPDTK <sub>0.50</sub> H <sub>0.50</sub> -TT      | 0.872 | 17.33 | 67.5  | 10.2  | 79 |
| PM6:Y6                     | PEIE-DBO                                          | 0.840 | 27.26 | 69.00 | 15.7  | 80 |
| PM6:Y6                     | TEA-capped ZnO                                    | 0.820 | 29.19 | 65.20 | 15.6  | 81 |
| PM6:Y6                     | ZnO:PBI-SO <sub>3</sub> H                         | 0.84  | 24.67 | 73.46 | 15.4  | 82 |
| PM6:Y6                     | ZnO/KOH                                           | 0.85  | 27.1  | 68.1  | 15.7  | 83 |
| PM6:Y6                     | ZnO/EDT                                           | 0.856 | 27.84 | 76.0  | 17.4  | 84 |
|                            | ZnO NPs/ASP-wrapped SD                            |       |       |       |       |    |
| PM6:Y6                     | SWNTs                                             | 0.870 | 24.90 | 66.09 | 14.3  | 85 |
| PM6:Y6                     | ZnO/Ti <sub>3</sub> C <sub>2</sub> T <sub>x</sub> | 0.830 | 26.38 | 75.40 | 16.51 | 86 |
| PM6:Y6                     | PDINO-G                                           | 0.85  | 25.65 | 75.78 | 16.5  | 87 |
| PM6:Y6                     | PDINO                                             | 0.821 | 25.58 | 72.24 | 15.17 | 88 |
| PM6:Y6                     | PDINN                                             | 0.847 | 25.89 | 78.59 | 17.23 | 88 |
| PM6:Y6                     | PDINO (15 nm)/Ag                                  | 0.861 | 26.15 | 77.80 | 17.48 | 89 |
| PM6:Y6                     | PDINOH                                            | 0.849 | 77.95 | 26.23 | 17.60 | 90 |
| PM6:Y6                     | QxTPPO1                                           | 0.86  | 26.37 | 75.00 | 16.83 | 91 |
| PM6:Y6                     | QxTPPO2                                           | 0.85  | 25.23 | 74.00 | 15.94 | 91 |
| PM6:Y6                     | POSSFN-G                                          | 0.849 | 25.34 | 73.93 | 15.9  | 92 |
| PM6:Y6                     | ADMAFN-G                                          | 0.845 | 25.45 | 74.91 | 16.1  | 92 |
| PM6:Y6                     | In <sub>2</sub> O <sub>3</sub>                    | 0.834 | 26.40 | 73.44 | 16.17 | 93 |
| PM6:Y6                     | Ga <sub>2</sub> O <sub>3</sub>                    | 0.825 | 26.03 | 74.55 | 16.01 | 93 |
| PM6:Y6                     | PFBP-Br                                           | 0.83  | 26.12 | 73.49 | 16.2  | 94 |
| PM6:Y6                     | SnO <sub>2</sub> (10 nm)                          | 0.831 | 26.63 | 72.75 | 16.1  | 95 |
| PM6:Y6                     | SnO <sub>2</sub> (160 nm)                         | 0.819 | 25.28 | 63.14 | 13.1  | 95 |
| PM6:Y6                     | <i>n</i> -SnO <sub>2</sub> /InP/ZnS QDs           | 0.845 | 25.48 | 70.63 | 15.22 | 96 |
| PM6:Y6                     | crosslinked Hf(ACBV) <sub>4</sub>                 | 0.83  | 25.69 | 73.1  | 15.1  | 97 |
| PM6:Y6                     | Al(acac) <sub>3</sub>                             | 0.817 | 20.71 | 73.34 | 12.4  | 98 |
| PM6:Y6                     | HDSID                                             | 0.84  | 25.84 | 71.84 | 15.6  | 99 |

|                                                 |                                                          |       |       |       |       |     |
|-------------------------------------------------|----------------------------------------------------------|-------|-------|-------|-------|-----|
| PM6:Y6                                          | Os≡C (30)                                                | 0.87  | 25.21 | 74.19 | 16.28 | 100 |
| PM6:Y6                                          | PET/AgNWs-GV                                             | 0.826 | 25.14 | 73.60 | 15.28 | 101 |
| PM6:Y6                                          | T2-CNORH                                                 | 0.863 | 25.50 | 70.70 | 15.50 | 102 |
| PM6:Y6                                          | ZnO/OSiND                                                | 0.830 | 25.31 | 76.93 | 16.16 | 103 |
| PM6:Y6 <sub>(ST-OSCs)</sub>                     | AgNW-BM                                                  | 0.716 | 20.84 | 61.26 | 9.12  | 104 |
| PM6:Y6:PC <sub>71</sub> BM <sub>(ST-OSCs)</sub> | Ag/ITO                                                   | 0.88  | 17.9  | 65.2  | 10.2  | 105 |
| PM6:Y6 <sub>(ST-OSCs)</sub>                     | 1 nm Au/20 nm Ag                                         | 0.854 | 22.12 | 72.27 | 14.20 | 106 |
| PM6:Y6 <sub>(ST-OSCs)</sub>                     | MDM (B)                                                  | 0.860 | 20.90 | 74.00 | 13.30 | 107 |
| PM6:Y6 <sub>(FST-OSCs)</sub>                    | D-PEDOT:PSS                                              | 0.80  | 19.28 | 68.36 | 10.5  | 108 |
| PM6:Y6 <sub>(flexible)</sub>                    | GR&AgNWs/PH1000                                          | 0.830 | 23.20 | 69.98 | 13.44 | 109 |
| PM6:Y6 <sub>(flexible)</sub>                    | Ti <sub>3</sub> C <sub>2</sub> T <sub>x</sub> /PEDOT:PSS | 0.83  | 24.78 | 64.0  | 13.15 | 110 |
| PM6:Y6                                          | CNP-20/Glass/ITO                                         | 0.860 | 26.53 | 71.22 | 16.17 | 111 |
| PM6:Y6                                          | LBL H <sub>2</sub> SO <sub>4</sub> /EG                   | 0.785 | 19.55 | 72.50 | 11.12 | 112 |
| PM6:Y6 <sub>(flexible)</sub>                    | PI@GR                                                    | 0.840 | 25.80 | 10.20 | 15.20 | 113 |
| PM6:Y6 <sub>(flexible)</sub>                    | Em-Ag/AGNWs:AZO-SG                                       | 0.832 | 25.05 | 72.97 | 15.2  | 114 |
| PM6:Y6 <sub>(flexible)</sub>                    | Treated cPI/AgN                                          | 0.830 | 26.03 | 70.00 | 15.12 | 115 |

**Table S4.** Contact angle of water(wat) and glycerol (oil) and surface tension of PEDOT:PSS and PEDOT:PSS-PDINN

| HTL             | $\theta_{\text{wat}}$ [deg] | $\theta_{\text{oil}}$ [deg] | $\gamma_s$ [mN m <sup>-1</sup> ] |
|-----------------|-----------------------------|-----------------------------|----------------------------------|
| PEDOT:PSS       | 17.9                        | 37.3                        | 70.94                            |
| PEDOT:PSS-PDINN | 18.4                        | 44.9                        | 73.85                            |



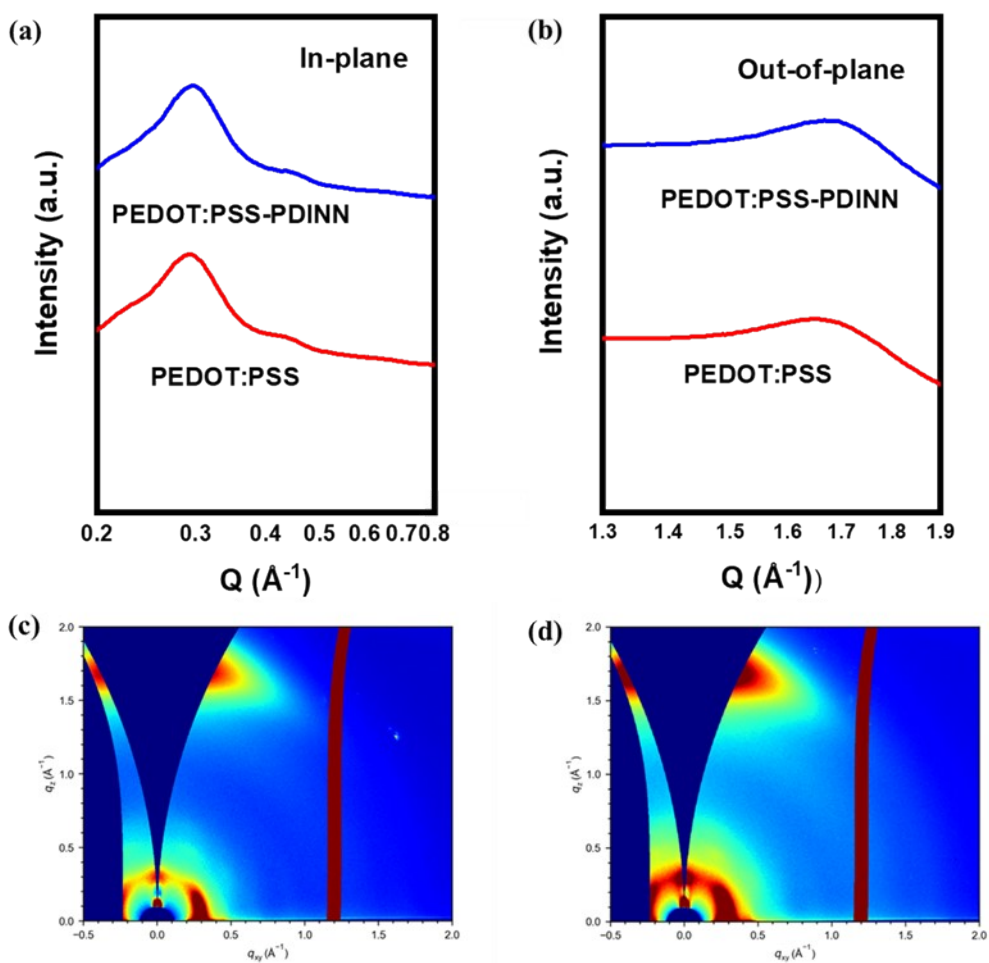

**Figure S1.** 1D profiles along the in-plane (a) and out-of-plane (b) directions and 2D GIWAXS patterns of the blend films based (c) PEDOT:PSS and (d) PEDOT:PSS-PDINN.

**Table S5.** Crystal Coherence lengths of the (010) peak and the d-spacing for the PM6:Y6 system prepared under two HTLs.

| Out of Plane (010) |                                |                           |      |                     |
|--------------------|--------------------------------|---------------------------|------|---------------------|
| HTL                | location ( $\text{\AA}^{-1}$ ) | d-spacing( $\text{\AA}$ ) | FWHM | CCL( $\text{\AA}$ ) |
| PEDOT:PSS          | 1.64                           | 3.82                      | 0.15 | 37.26               |
| PEDOT:PSS-PDINN    | 1.66                           | 3.78                      | 0.14 | 39.92               |

## Two Terminal Conductivity Study

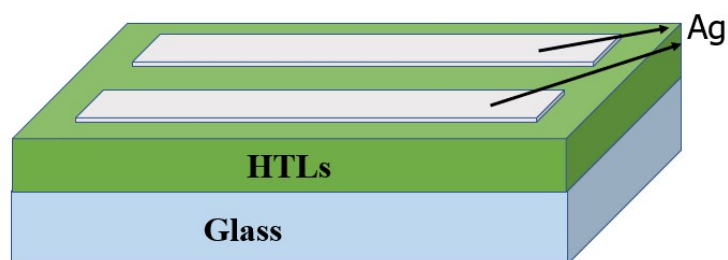

**Figure S2.** The schematic diagram of the device to measure the conductivity of HTL films.

The quartz sheet was coated with hole transport layer materials, and then 100 nm silver was deposited with a special mold. The calculation method is consistent with the paper.<sup>3</sup>

### Calculation of Flory-Huggins interaction parameters.

The surface energy  $\gamma_s$  values could be calculated according to Wu model on the neat films by the Equation:

$$\gamma = \gamma^d + \gamma^p \quad (1)$$

$$\gamma_L(1 + \cos \theta) = \frac{4\gamma_s^d \gamma_L^d}{\gamma_s^d + \gamma_L^d} + \frac{4\gamma_s^p \gamma_L^p}{\gamma_s^2 + \gamma_L^p} \quad (2)$$

And the two different contact angles of water and glycerol are measured to achieve the  $\gamma_s$ , And the  $\gamma$  is the sum of dispersion (d) and polar (p) components.

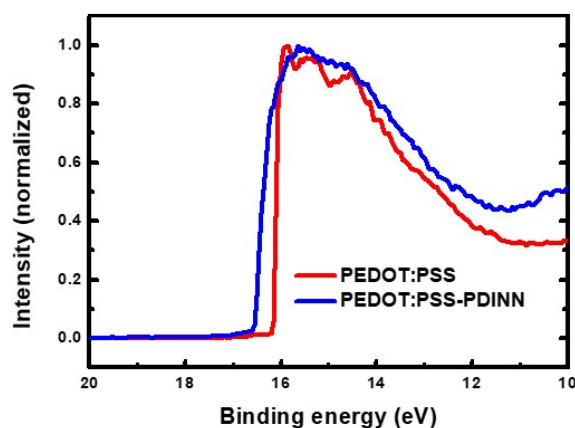

**Figure S3.** PEDOT:PSS and PEDOT:PSS-PDINN thin-film UPS. All UPS characterizations were taken from samples on ITO substrates.

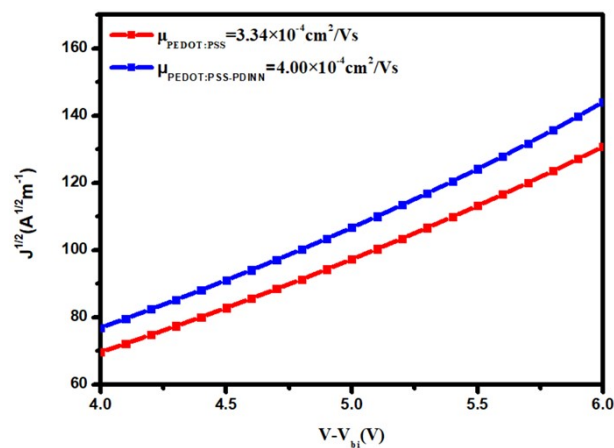

Figure S4. SCLC plots of BHJ films prepared on different HTLs

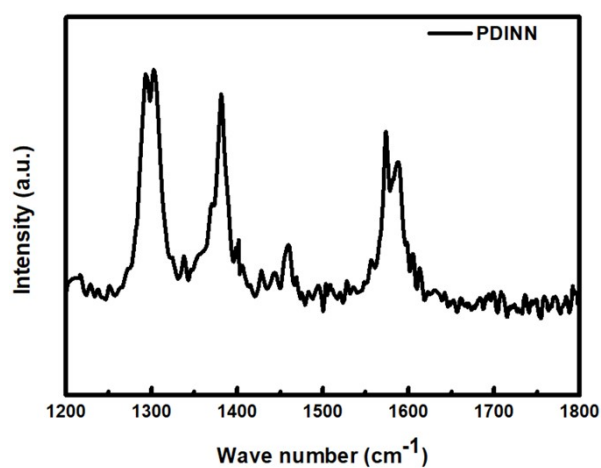

Figure S5. Raman spectrum of PDINN.

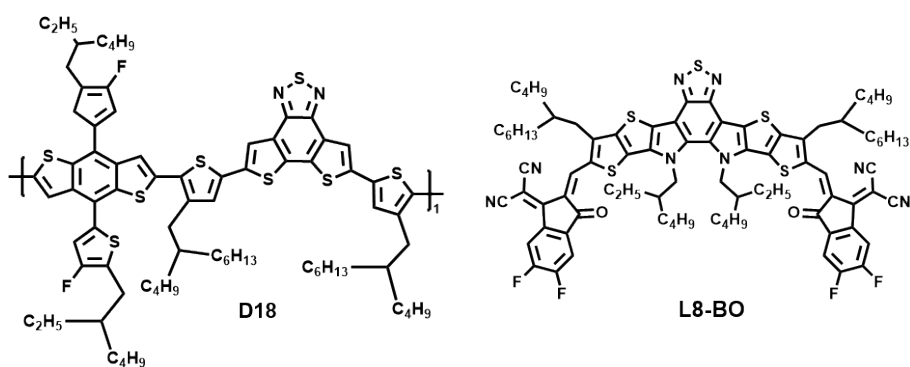

Figure S6. Molecular structures of D18 and L8-BO.

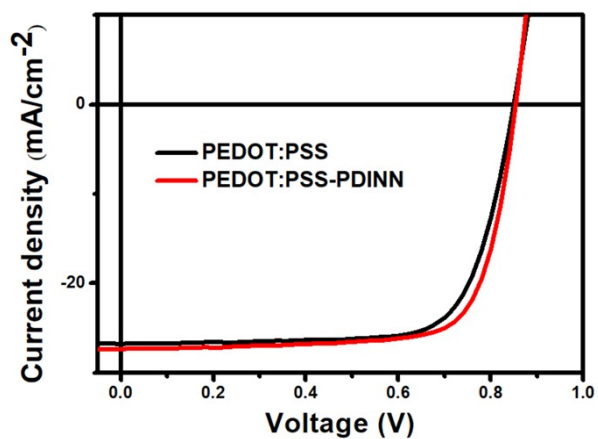

Figure S7. *J-V* diagram of the optimized D18:L8-BO system.

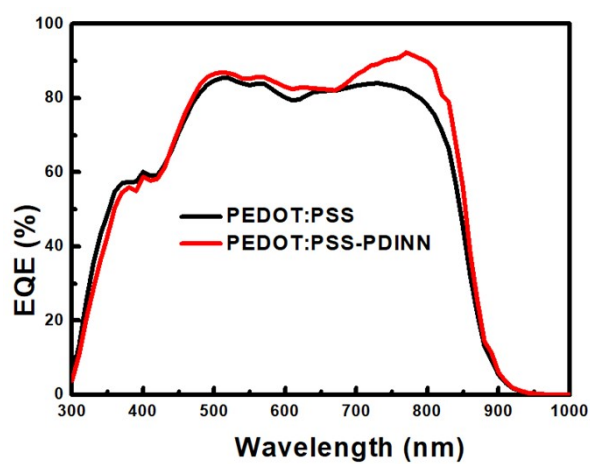

Figure S8. The EQE spectra of the devices based on optimized D18:L8-BO system.

---

## Reference

- S1 J. Yuan, Y. Zhang, L. Zhou, G. Zhang, H.-L. Yip, T.-K. Lau, X. Lu, C. Zhu, H. Peng, P. A. Johnson, M. Leclerc, Y. Cao, J. Ulanski, Y. Li and Y. Zou, *Joule*, 2019, **3**, 1140-1151.
- S2 Q. Liu, Y. Jiang, K. Jin, J. Qin, J. Xu, W. Li, J. Xiong, J. Liu, Z. Xiao, K. Sun, S. Yang, X. Zhang and L. Ding, *Sci. Bull.*, 2020, **65**, 272-275.
- S3 C. Song, Z. Zhong, Z. Hu, Y. Luo, L. Wang, J. Wang and Y. Cao, *Org. Electron*, 2017, **43**, 9-14.
- S4 G. Xie, Z. Zhang, Z. Su, X. Zhang and J. Zhang, *Nano Energy*, 2020, **69**, 104447.
- S5 J. Han, X. Wang, D. Huang, C. Yang, R. Yang and X. Bao, *Macromolecules*, 2020, **53**, 6619-6629.
- S6 B. H. Jiang, Y. P. Wang, C. Y. Liao, Y. M. Chang, Y. W. Su, R. J. Jeng and C. P. Chen, *ACS Appl. Mater. Interfaces*, 2021, **13**, 1076-1085.
- S7 Y. Chang, T.-K. Lau, P. C. Y. Chow, N. Wu, D. Su, W. Zhang, H. Meng, C. Ma, T. Liu, K. Li, X. Zou, K. S. Wong, X. Lu, H. Yan and C. Zhan, *J. Mater. Chem. A*, 2020, **8**, 3676-3685.
- S8 W. Zhang, J. Huang, J. Xu, M. Han, D. Su, N. Wu, C. Zhang, A. Xu and C. Zhan, *Adv. Energy Mater.*, 2020, **10**, 2001436.
- S9 Q. An, J. Wang, X. Ma, J. Gao, Z. Hu, B. Liu, H. Sun, X. Guo, X. Zhang and F. Zhang, *Energy Environ. Sci.*, 2020, **13**, 5039-5047.
- S10 T. Yan, J. Ge, T. Lei, W. Zhang, W. Song, B. Fanady, D. Zhang, S. Chen, R. Peng and Z. Ge, *J. Mater. Chem. A*, 2019, **7**, 25894-25899.
- S11 C. Yan, H. Tang, R. Ma, M. Zhang, T. Liu, J. Lv, J. Huang, Y. Yang, T. Xu, Z. Kan, H. Yan, F. Liu, S. Lu and G. Li, *Adv. Sci.*, 2020, **7**, 2000149.
- S12 Y. Yang, B. Qiu, S. Chen, Q. Zhou, Y. Peng, Z.-G. Zhang, J. Yao, Z. Luo, X. Chen, L. Xue, L. Feng, C. Yang and Y. Li, *J. Mater. Chem. A*, 2018, **6**, 9613-9622.
- S13 S. Chen, T. Yan, B. Fanady, W. Song, J. Ge, Q. Wei, R. Peng, G. Chen, Y. Zou and Z. Ge, *Sci. China Chem.*, 2020, **63**, 917-923.
- S14 D. Li, L. Zhu, X. Liu, W. Xiao, J. Yang, R. Ma, L. Ding, F. Liu, C. Duan, M. Fahlman and Q. Bao, *Adv. Mater.*, 2020, **32**, 2002344.
- S15 Y. Tang, J. Yu, H. Sun, Z. Wu, C. W. Koh, X. Wu, B. Liu, J. Wang, Q. Liao, Y. Li, H. Guo, H. Y. Woo, F. Gao and X. Guo, *Sol. RRL*, 2020, **4**, 2000396.
- S16 R. Yu, H. Yao, Y. Cui, L. Hong, C. He and J. Hou, *Adv. Mater.*, 2019, **31**, 1902302.
- S17 M.-A. Pan, T.-K. Lau, Y. Tang, Y.-C. Wu, T. Liu, K. Li, M.-C. Chen, X. Lu, W. Ma and C. Zhan, *J. Mater. Chem. A*, 2019, **7**, 20713-20722.
- S18 T. Yan, W. Song, J. Huang, R. Peng, L. Huang and Z. Ge, *Adv. Mater.*, 2019, **31**, 1902210.
- S19 S. He, Z. Shen, J. Yu, H. Guan, G. Lu, T. Xiao, S. Yang, Y. Zou and L. Bu, *Adv. Mater. Interfaces*, 2020, **7**, 2000577.
- S20 G. Zhang, X. K. Chen, J. Xiao, P. C. Y. Chow, M. Ren, G. Kupgan, X. Jiao, C. C. S. Chan, X. Du, R. Xia, Z. Chen, J. Yuan, Y. Zhang, S. Zhang, Y. Liu, Y. Zou, H. Yan, K. S. Wong, V. Coropceanu, N. Li, C. J. Brabec, J. L. Bredas, H. L. Yip and Y. Cao, *Nat. Commun.*, 2020, **11**, 3943.
- S21 K. Li, Y. Wu, Y. Tang, M. A. Pan, W. Ma, H. Fu, C. Zhan and J. Yao, *Adv. Energy Mater.*, 2019, **9**, 1901728.
- S22 Q. An, J. Wang, W. Gao, X. Ma, Z. Hu, J. Gao, C. Xu, M. Hao, X. Zhang, C. Yang and F. Zhang, *Sci. Bull.*, 2020, **65**, 538-545.
- S23 D. Su, M.-A. Pan, Z. Liu, T.-K. Lau, X. Li, F. Shen, S. Huo, X. Lu, A. Xu, H. Yan and C. Zhan, *Chem. Mater.*, 2019, **31**, 8908-8917.

- 
- S24 Q. An, X. Ma, J. Gao and F. Zhang, *Sci. Bull.*, 2019, **64**, 504-506.
- S25 R. Ma, T. Liu, Z. Luo, K. Gao, K. Chen, G. Zhang, W. Gao, Y. Xiao, T.-K. Lau, Q. Fan, Y. Chen, L.-K. Ma, H. Sun, G. Cai, T. Yang, X. Lu, E. Wang, C. Yang, A. K. Y. Jen and H. Yan, *ACS Energy Lett.*, 2020, **5**, 2711-2720.
- S26 J. Song, C. Li, L. Zhu, J. Guo, J. Xu, X. Zhang, K. Weng, K. Zhang, J. Min, X. Hao, Y. Zhang, F. Liu and Y. Sun, *Adv. Mater.*, 2019, **31**, 1905645.
- S27 N. Gasparini, S. H. K. Paleti, J. Bertrandie, G. Cai, G. Zhang, A. Wadsworth, X. Lu, H.-L. Yip, I. McCulloch and D. Baran, *ACS Energy Lett.*, 2020, **5**, 1371-1379.
- S28 Q. Ma, Z. Jia, L. Meng, J. Zhang, H. Zhang, W. Huang, J. Yuan, F. Gao, Y. Wan, Z. Zhang and Y. Li, *Nano Energy*, 2020, **78**, 105272.
- S29 Y. Cho, T. Kumari, S. Jeong, S. M. Lee, M. Jeong, B. Lee, J. Oh, Y. Zhang, B. Huang, L. Chen and C. Yang, *Nano Energy*, 2020, **75**, 104896.
- S30 G. Cai, Y. Li, J. Zhou, P. Xue, K. Liu, J. Wang, Z. Xie, G. Li, X. Zhan and X. Lu, *ACS Appl. Mater. Interfaces*, 2020, **12**, 50660-50667.
- S31 L. Zhan, S. Li, T.-K. Lau, Y. Cui, X. Lu, M. Shi, C.-Z. Li, H. Li, J. Hou and H. Chen, *Energy Environ. Sci.*, 2020, **13**, 635-645.
- S32 S. Li, L. Zhan, Y. Jin, G. Zhou, T. K. Lau, R. Qin, M. Shi, C. Z. Li, H. Zhu, X. Lu, F. Zhang and H. Chen, *Adv. Mater.*, 2020, **32**, 2001160.
- S33 T. Liu, R. Ma, Z. Luo, Y. Guo, G. Zhang, Y. Xiao, T. Yang, Y. Chen, G. Li, Y. Yi, X. Lu, H. Yan and B. Tang, *Energy Environ. Sci.*, 2020, **13**, 2115-2123.
- S34 S. Dong, K. Zhang, T. Jia, W. Zhong, X. Wang, F. Huang and Y. Cao, *EcoMat.*, 2019, **1**, 12006.
- S35 Y. Ma, X. Zhou, D. Cai, Q. Tu, W. Ma and Q. Zheng, *Mater. Horiz.*, 2020, **7**, 117-124.
- S36 X. Liao, Q. He, G. Zhou, X. Xia, P. Zhu, Z. Xing, H. Zhu, Z. Yao, X. Lu and Y. Chen, *Chem. Mater.*, 2020, **33**, 430-440.
- S37 X. Du, J. Zhao, H. Zhang, X. Lu, L. Zhou, Z. Chen, H. Lin, C. Zheng and S. Tao, *J. Mater. Chem. A*, 2019, **7**, 20139-20150.
- S38 X. Du, Y. Yuan, L. Zhou, H. Lin, C. Zheng, J. Luo, Z. Chen, S. Tao and L. S. Liao, *Adv. Funct. Mater.*, 2020, **30**, 1909837.
- S39 D. Li, X. Chen, J. Cai, W. Li, M. Chen, Y. Mao, B. Du, J. A. Smith, R. C. Kilbride, M. E. O’Kane, X. Zhang, Y. Zhuang, P. Wang, H. Wang, D. Liu, R. A. L. Jones, D. G. Lidzey and T. Wang, *Sci. China Chem.*, 2020, **63**, 1461-1468.
- S40 T. Yang, R. Ma, H. Cheng, Y. Xiao, Z. Luo, Y. Chen, S. Luo, T. Liu, X. Lu and H. Yan, *J. Mater. Chem. A*, 2020, **8**, 17706-17712.
- S41 K. Li, Y. Wu, X. Li, H. Fu and C. Zhan, *Sci. China Chem.*, 2020, **63**, 490-496.
- S42 X. Ma, J. Wang, Q. An, J. Gao, Z. Hu, C. Xu, X. Zhang, Z. Liu and F. Zhang, *Nano Energy*, 2020, **70**, 104496.
- S43 M. Zhang, L. Zhu, G. Zhou, T. Hao, C. Qiu, Z. Zhao, Q. Hu, B. W. Larson, H. Zhu, Z. Ma, Z. Tang, W. Feng, Y. Zhang, T. P. Russell and F. Liu, *Nat. Commun.*, 2021, **12**, 309.
- S44 L. Zhu, M. Zhang, G. Zhou, T. Hao, J. Xu, J. Wang, C. Qiu, N. Prine, J. Ali, W. Feng, X. Gu, Z. Ma, Z. Tang, H. Zhu, L. Ying, Y. Zhang and F. Liu, *Adv. Energy Mater.*, 2020, **10**, 2070083.
- S45 H. Zhao, H. B. Naveed, B. Lin, X. Zhou, J. Yuan, K. Zhou, H. Wu, R. Guo, M. A. Scheel, A. Chumakov, S. V. Roth, Z. Tang, P. Müller-Buschbaum and W. Ma, *Adv. Mater.*, 2020, **32**, 202002302.
- S46 R. Zeng, S. Du, Y. Gong, Y. Bai, S. Hu, T. Hayat, A. Alsaedi and Z. Tan, *ACS Appl. Mater. Interfaces*, 2020, **12**, 31459-31466.
- S47 Y. Qin, Y. Xu, Z. Peng, J. Hou and H. Ade, *Adv. Funct. Mater.*, 2020, **30**, 202005011.

- 
- S48 D. Zhang, Q. Li, J. Zhang, J. Wang, X. Zhang, R. Wang, J. Zhou, Z. Wei, C. Zhang, H. Zhou and Y. Zhang, *ACS Appl. Mater. Interfaces*, 2020, **12**, 667-677.
- S49 Y. Lin, Y. Firdaus, M. I. Nugraha, F. Liu, S. Karuthedath, A. H. Emwas, W. Zhang, A. Seitkhan, M. Neophytou, H. Faber, E. Yengel, I. McCulloch, L. Tsetseris, F. Laquai and T. D. Anthopoulos, *Adv. Sci.*, 2020, **7**, 1903419.
- S50 L. Liu, Y. Kan, K. Gao, J. Wang, M. Zhao, H. Chen, C. Zhao, T. Jiu, A. K. Y. Jen and Y. Li, *Adv. Mater.*, 2020, **32**, 1907604.
- S51 S. M. Hosseini, N. Tokmoldin, Y. W. Lee, Y. Zou, H. Y. Woo, D. Neher and S. Shoaee, *Sol. RRL*, 2020, **4**, 2000498.
- S52 J. Fu, S. Chen, K. Yang, S. Jung, J. Lv, L. Lan, H. Chen, D. Hu, Q. Yang, T. Duan, Z. Kan, C. Yang, K. Sun, S. Lu, Z. Xiao and Y. Li, *iScience*, 2020, **23**, 100965.
- S53 L. Ye, Y. Xiong, M. Zhang, X. Guo, H. Guan, Y. Zou and H. Ade, *Nano Energy*, 2020, **77**, 105310.
- S54 X. Zhang, Y. Li, D. Zhang, G. Wu, H. Zhang, J. Zhou, X. Li, Z. Sauduz, J. Zhang, Z. Wei, H. Zhou and Y. Zhang, *Sci. China Chem.*, 2020, **64**, 116-126.
- S55 R. Yu, H. Yao, Z. Chen, J. Xin, L. Hong, Y. Xu, Y. Zu, W. Ma and J. Hou, *Adv. Mater.*, 2019, **31**, 1900477.
- S56 J. Cai, H. Wang, X. Zhang, W. Li, D. Li, Y. Mao, B. Du, M. Chen, Y. Zhuang, D. Liu, H.-L. Qin, Y. Zhao, J. A. Smith, R. C. Kilbride, A. J. Parnell, R. A. L. Jones, D. G. Lidzey and T. Wang, *J. Mater. Chem. A*, 2020, **8**, 4230-4238.
- S57 L. Ye, Y. Cai, C. Li, L. Zhu, J. Xu, K. Weng, K. Zhang, M. Huang, M. Zeng, T. Li, E. Zhou, S. Tan, X. Hao, Y. Yi, F. Liu, Z. Wang, X. Zhan and Y. Sun, *Energy Environ. Sci.*, 2020, **13**, 5117-5125.
- S58 X. Zhou, X. Li, Y. Yan, F. Zhang, J. Zhou, T. Lin, Y. Zhu and D. Xu, *Sol. RRL*, 2022, **6**, 2200424.
- S59 H. Lu, K. Chen, R. S. Bobba, J. Shi, M. Li, Y. Wang, J. Xue, P. Xue, X. Zheng, K. E. Thorn, I. Wagner, C. Y. Lin, Y. Song, W. Ma, Z. Tang, Q. Meng, Q. Qiao, J. M. Hodgkiss and X. Zhan, *Adv. Mater.*, 2022, **34**, 2205926.
- S60 L. Wang, L. Zhang, S. Kim, T. Wang, Z. Yuan, C. Yang, Y. Hu, X. Zhao and Y. Chen, *Small*, 2023, **19**, 2206607.
- S61 Q. Yang, S. Yu, P. Fu, W. Yu, Y. Liu, X. Liu, Z. Feng, X. Guo and C. Li, *Adv. Funct. Mater.*, 2020, **30**, 1910205.
- S62 M. Zeng, X. Wang, R. Ma, W. Zhu, Y. Li, Z. Chen, J. Zhou, W. Li, T. Liu, Z. He, H. Yan, F. Huang and Y. Cao, *Adv. Energy Mater.*, 2020, **10**, 2000743.
- S63 H. Tang, Z. Liu, Z. Hu, Y. Liang, F. Huang and Y. Cao, *Sci. China Chem.*, 2020, **63**, 802-809.
- S64 N. S. Alharbi, C. Wang, F. E. Alsaadi, S. O. Rabah and Z. Tan, *Adv. Sustainable Syst.*, 2020, **4**, 2000054.
- S65 S. Pei, X. Xiong, W. Zhong, X. Xue, M. Zhang, T. Hao, Y. Zhang, F. Liu and L. Zhu, *ACS Appl. Mater. Interfaces*, 2022, **14**, 34814-34821.
- S66 C. Hou and H. Yu, *J. Mater. Chem. C*, 2020, **8**, 4169-4180.
- S67 K. Yang, S. Chen, J. Fu, S. Jung, J. Ye, Z. Kan, C. Hu, C. Yang, Z. Xiao, S. Lu and K. Sun, *ACS Appl. Mater. Interfaces*, 2020, **12**, 30954-30961.
- S68 J. Dong, J. Guo, X. Wang, P. Dong, Z. Wang, Y. Zhou, Y. Miao, B. Zhao, Y. Hao, H. Wang, B. Xu and S. Yin, *ACS Appl. Mater. Interfaces*, 2020, **12**, 46373-46380.
- S69 Y. Lin, B. Adilbekova, Y. Firdaus, E. Yengel, H. Faber, M. Sajjad, X. Zheng, E. Yarali, A. Seitkhan, O. M. Bakr, A. El-Labban, U. Schwingenschlogl, V. Tung, I. McCulloch, F. Laquai and T. D. Anthopoulos, *Adv. Mater.*, 2019, **31**, 1902965.
- S70 H. N. Tran, S. Park, F. T. A. Wibowo, N. V. Krishna, J. H. Kang, J. H. Seo, H. Nguyen-Phu, S.-Y. Jang and S. Cho, *Adv. Sci.*, 2020, **7**, 2002395.
- S71 Z. Huang, D. Ouyang, R. Ma, W. Wu, V. A. L. Roy and W. C. H. Choy, *Adv. Funct. Mater.*, 2019, **29**, 1904684.

- 
- S72 Y. Ge, L. Hu, L. Zhang, Q. Fu, G. Xu, Z. Xing, L. Huang, W. Zhou and Y. Chen, *ACS Appl. Mater. Interfaces*, 2020, **12**, 10706-10716.
- S73 B. Liu, Y. Wang, P. Chen, X. Zhang, H. Sun, Y. Tang, Q. Liao, J. Huang, H. Wang, H. Meng and X. Guo, *ACS Appl. Mater. Interfaces*, 2019, **11**, 33505-33514.
- S74 J. J. Park, Y. J. Heo, J. M. Yun, Y. Kim, S. C. Yoon, S. H. Lee and D. Y. Kim, *ACS Appl. Mater. Interfaces*, 2020, **12**, 42811-42820.
- S75 M. Liu, P. Fan, Q. Hu, T. P. Russell and Y. Liu, *Angew. Chem. Int. Ed.*, 2020, **59**, 18131-18135.
- S76 X. Yang, Y. Lin, J. Liu, W. Liu, Q. Bi, X. Song, J. Kang, F. Xu, L. Xu, M. N. Hedhili, D. Baran, X. Zhang, T. D. Anthopoulos and S. De Wolf, *Adv. Mater.*, 2020, **32**, 2002608.
- S77 A. Seitkhan, M. Neophytou, M. Kirkus, E. Abou-Hamad, M. N. Hedhili, E. Yengel, Y. Firdaus, H. Faber, Y. Lin, L. Tsetseris, I. McCulloch and T. D. Anthopoulos, *Adv. Funct. Mater.*, 2019, **29**, 1905810.
- S78 Q. Li, Y. Sun, C. Yang, K. Liu, M. R. Islam, L. Li, Z. Wang and S. Qu, *Sci. Bull.*, 2020, **65**, 747-752.
- S79 H. Xu, H. Zou, D. Zhou, G. Zeng, L. Chen, X. Liao and Y. Chen, *ACS Appl. Mater. Interfaces*, 2020, **12**, 52028-52037.
- S80 Z. Zhang, Z. Zhang, Y. Yu, B. Zhao, S. Li, J. Zhang and S. Tan, *J. Energy Chem.*, 2020, **47**, 196-202.
- S81 H. Jiang, T. Li, X. Han, X. Guo, B. Jia, K. Liu, H. Cao, Y. Lin, M. Zhang, Y. Li and X. Zhan, *ACS Appl. Energ. Mater.*, 2019, **3**, 1111-1118.
- S82 Y. Luo, S. Fang, N. Zheng, L. Liu, F. Würthner and Z. Xie, *Acs Appl. Energ. Mater.*, 2020, **3**, 1694-1701.
- S83 H. W. Cheng, P. Raghunath, K. L. Wang, P. Cheng, T. Haung, Q. Wu, J. Yuan, Y. C. Lin, H. C. Wang, Y. Zou, Z. K. Wang, M. C. Lin, K. H. Wei and Y. Yang, *Nano Lett.*, 2020, **20**, 715-721.
- S84 D. H. Kim, F. T. A. Wibowo, D. Lee, N. V. Krishna, S. Park, S. Cho and S. Y. Jang, *Energy Environ. Mater.*, 2022, **0**, 1-8.
- S85 S. H. Lee, S. J. Ko, S. H. Eom, H. Kim, D. W. Kim, C. Lee and S. C. Yoon, *ACS Appl. Mater. Interfaces*, 2020, **12**, 14244-14253.
- S86 C. Hou and H. Yu, *Chem. Eng. J.*, 2021, **407**, 127192.
- S87 F. Pan, C. Sun, Y. Li, D. Tang, Y. Zou, X. Li, S. Bai, X. Wei, M. Lv, X. Chen and Y. Li, *Energy Environ. Sci.*, 2019, **12**, 3400-3411.
- S88 J. Yao, B. Qiu, Z. G. Zhang, L. Xue, R. Wang, C. Zhang, S. Chen, Q. Zhou, C. Sun, C. Yang, M. Xiao, L. Meng and Y. Li, *Nat. Commun.*, 2020, **11**, 2726.
- S89 L. Zhang, H. Mao, L. Huang, L. Hu, X. Wang, L. Tan and Y. Chen, *Sci. China Chem.*, 2022, **65**, 1623-1633.
- S90 M. Zi, X. Chen, S. Tan, C. Weng and B. Zhao, *Chem. Eng. J.*, 2022, **443**, 136455.
- S91 J. T. Kim, J. Lee, S. Jang, Z. Yu, J. H. Park, E. D. Jung, S. Lee, M. H. Song, D. R. Whang, S. Wu, S. H. Park, D. W. Chang and B. R. Lee, *J. Mater. Chem. A*, 2020, **8**, 13501-13508.
- S92 F. Pan, S. Bai, X. Wei, Y. Li, D. Tang, X. Chen, M. Lv and Y. Li, *Sci. China Mater.*, 2020, **64**, 277-287.
- S93 Y. Bai, R. Shi, Y. Bai, F. Wang, J. Wang, T. Hayat, A. Alsaedi and Z. Tan, *Sci. China Mater.*, 2020, **64**, 1095-1104.
- S94 L. Tian, J. Jing, H. Tang, Y. Liang, Z. Hu, M. Rafiq, F. Huang and Y. Cao, *Sol. RRL*, 2020, **5**, 2000523.
- S95 Y. Bai, C. Zhao, S. Zhang, S. Zhang, R. Yu, J. Hou, Z. Tan and Y. Li, *Sci. China Chem.*, 2020, **63**, 957-965.
- S96 R. Peng, T. Yan, J. Chen, S. Yang, Z. Ge and M. Wang, *Adv. Electron. Mater.*, 2020, **6**, 1901245.
- S97 H. Liu, Z. Ma, R. Yu, H. Gao, J. Lin, T. Hayat, A. Alsaedi and Z. Tan, *Mater. Chem. Front.*, 2020, **4**, 2995-3002.
- S98 Y. Bai, C. Zhao, R. Shi, J. Wang, F. Wang, T. Hayat, A. Alsaedi and Z. Tan, *Mater. Chem. Front.*, 2020, **4**, 2072-2080.
- S99 Y. Li, W. Song, T. Yan, J. Xiao, Y. Han, S. Chen, R. Peng, J. Zhang and Z. Ge, *Org. Electron*, 2020, **85**,



---

105863.

- S100 S. Chen, L. Liu, X. Gao, Y. Hua, L. Peng, Y. Zhang, L. Yang, Y. Tan, F. He and H. Xia, *Nat. Commun.*, 2020, **11**, 4651.
- S101 Z. Wang, Y. Han, L. Yan, C. Gong, J. Kang, H. Zhang, X. Sun, L. Zhang, J. Lin, Q. Luo and C. Q. Ma, *Adv. Funct. Mater.*, 2020, **31**, 2007276.
- S102 B. Lee, S. Jeong, Y. Cho, M. Jeong, S. M. Lee, J. Oh and C. Yang, *Adv. Funct. Mater.*, 2020, **30**, 2005037.
- S103 M. Cui, D. Li, X. Du, N. Li, Q. Rong, N. Li, L. Shui, G. Zhou, X. Wang, C. J. Brabec and L. Nian, *Adv. Mater.*, 2020, **32**, 2002973.
- S104 Y. Xiong, R. E. Booth, T. Kim, L. Ye, Y. Liu, Q. Dong, M. Zhang, F. So, Y. Zhu, A. Amassian, B. T. O'Connor and H. Ade, *Sol. RRL*, 2020, **4**, 2000328.
- S105 B. H. Jiang, H. E. Lee, J. H. Lu, T. H. Tsai, T. S. Shieh, R. J. Jeng and C. P. Chen, *ACS Appl. Mater. Interfaces*, 2020, **12**, 39496-39504.
- S106 Z. Hu, Z. Wang, Q. An and F. Zhang, *Sci. Bull.*, 2020, **65**, 131-137.
- S107 H. R. Yeom, S. Song, S. Y. Park, H. S. Ryu, J. W. Kim, J. Heo, H. W. Cho, B. Walker, S.-J. Ko, H. Y. Woo and J. Y. Kim, *Nano Energy*, 2020, **77**, 105146.
- S108 W. Song, B. Fanady, R. Peng, L. Hong, L. Wu, W. Zhang, T. Yan, T. Wu, S. Chen and Z. Ge, *Adv. Energy Mater.*, 2020, **10**, 2000136.
- S109 W. Zhang, W. Song, J. Huang, L. Huang, T. Yan, J. Ge, R. Peng and Z. Ge, *J. Mater. Chem. A*, 2019, **7**, 22021-22028.
- S110 L. Qin, J. Jiang, Q. Tao, C. Wang, I. Persson, M. Fahlman, P. O. Å. Persson, L. Hou, J. Rosen and F. Zhang, *J. Mater. Chem. A*, 2020, **8**, 5467-5475.
- S111 J. Wu, X. Che, H.-C. Hu, H. Xu, B. Li, Y. Liu, J. Li, Y. Ni, X. Zhang and X. Ouyang, *J. Mater. Chem. A*, 2020, **8**, 5442-5448.
- S112 X. Fan, R. Wen, Y. Xia, J. Wang, X. Liu, H. Huang, Y. Li, W. Zhu, Y. Cheng, L. Ma, J. Fang, H. Tsai and W. Nie, *Sol. RRL*, 2020, **4**, 1900543.
- S113 D. Koo, S. Jung, J. Seo, G. Jeong, Y. Choi, J. Lee, S. M. Lee, Y. Cho, M. Jeong, J. Lee, J. Oh, C. Yang and H. Park, *Joule*, 2020, **4**, 1021-1034.
- S114 X. Chen, G. Xu, G. Zeng, H. Gu, H. Chen, H. Xu, H. Yao, Y. Li, J. Hou and Y. Li, *Adv. Mater.*, 2020, **32**, 1908478.
- S115 J. Kim, D. Ouyang, H. Lu, F. Ye, Y. Guo, N. Zhao and W. C. H. Choy, *Adv. Energy Mater.*, 2020, **10**, 1903919.
